# Supplementary material
Source: PubMed Central journal article supplement (PMC4578578)
Supplement: supp_nov027_nov027supp.pdf [file supp_nov027_nov027supp.pdf]

# Somatic POLE mutations cause an ultramutated giant cell high-grade glioma subtype with better prognosis

|                                                                                                                          |    |
|--------------------------------------------------------------------------------------------------------------------------|----|
| METHODS .....                                                                                                            | 2  |
| Exome Sequencing and Analysis of sequencing results: .....                                                               | 2  |
| Mutation Signature Analysis: .....                                                                                       | 4  |
| Copy number variation (CNV) and admixture rate calculation from exome data.....                                          | 5  |
| Clonality Analysis: .....                                                                                                | 6  |
| Sanger Confirmation for the segregation of <i>MSH6</i> mutation.....                                                     | 6  |
| Clinical and histological features.....                                                                                  | 7  |
| Treatment information for POLE mutant cases in Yale cohort: .....                                                        | 7  |
| TCGA data access and analysis: .....                                                                                     | 7  |
| Survival Analysis .....                                                                                                  | 8  |
| FIGURES: .....                                                                                                           | 9  |
| Supplementary Figure S1: Mutation Spectrum for 55 primary HGGs. ....                                                     | 9  |
| Supplementary Figure S2: Mutation signature distribution in 55 primary HGGs.....                                         | 10 |
| Supplementary Figure S3: Distribution of percentage of genome alteration by CNV events. ....                             | 11 |
| Supplementary Figure S4: Sanger confirmation for the germline homozygous <i>MSH6</i> in pediatric GBM cases .....        | 12 |
| Supplementary Figure S5: H&E stained sections of 6 <i>POLE</i> mutant cases.....                                         | 13 |
| Supplementary Figure S8: Flow chart for the identification of POLE mutated ultramutated gliomas.....                     | 16 |
| TABLES.....                                                                                                              | 18 |
| Table S1. Sequencing metrics for 55 primary HGG cases from the Yale cohort.....                                          | 18 |
| Table S2. Mutation signature data .....                                                                                  | 20 |
| Table S3. Clinical information for 55 primary HGG (i.e. wildtype for <i>IDH1-R132</i> ) cases from the Yale cohort. .... | 22 |
| Table S4. Mutational profile for all HGGs in Yale cohort (53 adults and 2 pediatric cases). ....                         | 26 |

## **METHODS**

### **Exome Sequencing and Analysis of sequencing results:**

We performed whole-exome capture and next generation sequencing of 136 adult gliomas. Ninety-one of these samples had matching blood samples; 53 of which were primary gliomas.

Exome Capture and Sequencing: Nimblegen/Roche human solution-capture exome array (Roche Nimblegen, Inc.) was used to capture the exomes of blood and tumor samples according to the manufacturer's protocol with modifications<sup>1</sup>. Sequencing of the library was performed on Illumina HiSeq instruments using 74 base pairs paired-end reads by multiplexing two tumor samples or three blood samples per lane.

We have performed a deeper coverage of tumors as compared to matching blood samples to achieve a better resolution with subclonal mutations (average target coverage was 194.3 and 121.3, respectively). The average percentage of reads with at least 20x coverage was 91.0% and 88.4% for tumor and blood, respectively (Supplementary Table S1).

We have performed a quality control step on the raw reads before alignment for filtering out low quality reads and adapter contamination as detailed previously<sup>2</sup>.

The alignment is performed to the human genome reference sequence (version GRCh37) with BWA (version 0.5.9-r16)<sup>3</sup> followed by Stampy (version 1.0.16)<sup>4</sup>. PCR duplicates were excluded from further analysis as previously described<sup>5</sup> using MarkDuplicates algorithm from Picard (version 1.47, <http://picard.sourceforge.net/>).

We performed multi-sequence local realignment around putative and known insertion/deletion sites. This was followed by the base quality score recalibration using the Genome Analysis Toolkit (GATK, version 2.5-20)<sup>5</sup>.

Germline and Somatic Variant Calling: For germline mutations (in blood) we used Unified Genotyper implemented in Genome Analysis Toolkit (GATK, version 2.5-2) and called variants using additional 250 exomes from individuals of European descent. For the tumor-blood matched samples, we determined the somatic mutations using Haplotype caller implemented in Genome Analysis Toolkit (GATK, version 2.5)<sup>5</sup> and calculated a somatic score according to the method described by Li<sup>6</sup>.

Variant annotation was performed after variant calling using Ensembl database (version 69) with the help of Variant Effect Predictor (VEP, v2.7) tool ([http://useast.ensembl.org/info/docs/variation/vep/vep\\_script.html](http://useast.ensembl.org/info/docs/variation/vep/vep_script.html)). Missense variants are annotated to be deleterious, if either SIFT<sup>7</sup> or Polyphen2<sup>8</sup> predicts it to be deleterious or damaging. We selected the most-deleterious consequence out of all annotated transcripts for each variant site based on the consequence ordering suggested by VEP.

For variant quality filtering of the germline exome data, we eliminated variants that are within 10 base pairs from a putative insertion/deletion. We also filtered out variants using variant quality score recalibration lod score (log odds ratio of being a true vs. false variant) to achieve a required sensitivity of 99% and 95% for SNPs and INDELS respectively.

For the somatic variant quality control, we filtered out the variants according to the classes of genotype changes in tumor with respect to the normal and kept the following types of alterations (i) somatic, where the normal has a homozygous genotype for the

reference allele and the tumor has a heterozygous genotype or has a homozygous genotype for the variant allele. (ii) loss of heterozygosity, where the normal is heterozygous for the reference allele and the tumor has a homozygous genotype for the variant allele. We also used various quality metrics to filter out variants: (i) with a somatic score less than 20, (ii) overlapping a RepeatMasker or segmental duplication annotated region, (iii) with low quality (<30) and low quality-by-depth values (<1), (iv) with high mapping quality zero reads, (v) with strand bias, (vi) in a mutation cluster of size >2 (vii) with homopolymer runs of length  $\geq 10$  base pairs within  $\pm 5$  base pairs around the mutation or from the right of the mutation or (viii) with ClippingRankSum (calculated by GATK)  $< -3.0$  or  $> 3.0$ .

In addition, we excluded any variant with a frequency of greater than or equal to 1% in the NHLBI Exome Variant Server Database (<http://evs.gs.washington.edu/EVS/>) and 1000Genome Database<sup>9</sup>. We also used our internal database of 2,216 exomes (excluding the common SNPs) to compare the variant allele frequency for each gene and excluded the variants in genes that have greater than 150 variant alleles in this database.

### **Mutation Signature Analysis:**

We have calculated the mutation signature of individual tumors' somatic mutations by considering 6 major mutation classes, i.e., G:C > T:A, G:C > A:T, G:C > C:G, A:T > G:C, A:T > C:G, A:T > T:A (Fig. S1). In the discovery cohort of 53 primary adult HGGs, we observed a significant enrichment on the C>T transitions with the following mean values (Fig. S1-S2, Table S3): C>T 64.78% (range = [37.50%-100%]), C>A 9.18% ([range = 0%-19.61%]), C>G 6.14% (range = [0%-16.67%]), T>A 5.26% (range = [0%-12.50%]), T>G 3.84% (range = [0%-10.55%]) and T>C 10.78% (range = [0%-22.86%]).

GBM-10468, an adult HGG with *POLE* mutation had an increased C > A transversion ratio. Out of all somatic mutations, 45.84% were C>T transitions, 20% were C>A transversions, 0.20% were C>G transversions, 0.9% were T>A transversions, 16.13% were T>G transversions and 16.79% were T>C transitions.

GBM-60001 had a similar pattern with 61% C>T transitions, 19.21% C>A transversions, 0.02% C>G transversions, 1% T>A transversions, 8.4% T>G transversions and 9.8% T>C transversions.

Overall, ultramutated samples did not show a significant difference compared to the rest of the HGGs for C>T transitions, T>G transversions and T>C transitions.

For C > A transversions, ultramutated samples had (avg=20%) a significant increase compared to the rest of the HGGs (avg= 9.4%)( $P = 3.8e-06$ ). For C>G transversions ultramutated samples had (mean= 0.2%) a significant decrease in this class of mutations compared to the rest of the HGGs (mean= 6.3%)( $P = 4.15e-16$ ). Similarly for T>A transversions, ultramutated samples had (mean= 0.9%) a significant decrease compared to the rest (mean= 5.2%,  $P = 1.91e-14$ ) (Fig. S2).

Two-sided t-test was used to calculate the significance of signature distributions among the ultramutated and non-ultramutated samples.

### **Copy number variation (CNV) and admixture rate calculation from exome data**

The log ratio of depth of coverage between tumor and blood was calculated using GATK-*Depth Of Coverage* tool. CNV segments were then called from the log ratio of depth of coverage using ExomeCNV R package<sup>10</sup>. False positive CNV events were corrected by calculating minor allele frequencies (BAF) in each CNV segment. (Fig. S3)

We estimated the admixture rate based on CNV analysis of paired tumor and blood samples. Copy number loss regions were extracted and for those regions the BAF of each tumor snp that was heterozygous in blood were calculated. Finally the admixture rate was estimated from the degree of deviation from homozygosity using qpure R package<sup>11</sup>.

CNV and mutation status of all HGGs in Yale cohort (53 adult, 2 pediatric) for genes that are frequently altered in GBMs are listed in Supplementary Table S4.

### **Clonality Analysis:**

Clonality rate is defined to be the percent of tumor cells harboring the identified somatic mutation and correlates with the temporal evolution of the tumor<sup>12,13</sup>.

We estimated the percent of cells that harbor the heterozygous somatic mutations based on the observed variant allele frequency, ploidy at the site of variant and the admixture rate similarly as previously described<sup>14</sup>. We observed that *POLE* exonuclease domain mutations were clonal, i.e > 80% of tumor cells harbored these mutations in all cases.

Moreover, we analyzed the distribution of variant allele frequencies of all somatic mutations (coding and non-coding) for all ultra-mutated cases and observed that majority of somatic mutations had a lower variant allele frequency than *POLE* exonuclease mutations, suggesting that the increased mutation burden occurred after the *POLE* mutations.

### **Sanger Confirmation for the segregation of *MSH6* mutation**

Coding regions and exon-intron boundaries of *MSH6* were evaluated by Sanger sequencing using standard protocols. Amplicons were cycle sequenced on ABI 9800 Fast

Thermo cyclers, and post cycle sequencing clean-up was carried out with CleanSEQ System (Beckman Coulter Genomics). The amplicons were analyzed on 3730×L DNA Analyzer (Applied Biosystems Inc.)

The mutation identified via whole-exome sequencing was confirmed as being homozygous versus heterozygous, in the two affected siblings versus their parents, respectively (Fig. S4).

### **Clinical and histological features**

Clinical features for all tumors, such as age at diagnosis, progression-free survival time were analyzed, when available (Supplementary Table 3). Histological features of the samples were analyzed by two independent neuropathologists using H&E, GFAP and nuclear p53 stainings, when available.

### ***Treatment information for POLE mutant cases in Yale cohort:***

All adult cases and the older of the two pediatric cases (age =8) have been treated according to standard protocols, including maximum surgical resection, followed by radiation and temolozomide therapy. The younger sibling had maximum surgical resection, followed by ciplatin and etoposide therapy. Given the age of the patient, radiation therapy was not recommended.

### ***TCGA data access and analysis:***

The clinical information for 567 GBM samples are downloaded from <https://tcga-data.nci.nih.gov/tcga/>. Mutation information for the 2 ultramutated GBM samples from the TCGA database is provided by the Center for Molecular Oncology and the Computational Biology Center at Memorial Sloan-Kettering Cancer Center through

cbiportal (<http://www.cbiportal.org/>). The data included the coding somatic mutations for the 2 cases with genomic positions, including reference and alternate alleles, variant impact class, variant type, transcript change. We have used the protein altering mutation count to assess the ultramutation phenotype. We have also used the reference and alternate allele information to compare the mutation signature of these samples to the previously identified *POLE* mutated samples' signature.

### **Survival Analysis**

We have used the survival R package<sup>15</sup> to perform the Kaplan-Meier analysis on the time to recurrence metric between the *POLE* mutated ultra-mutated samples and the rest. We used the same package to calculate the logrank p value for the significance of difference in time to recurrence in two datasets, *POLE* mutant vs. *POLE* wildtype HGGs.

In order to assess the clinical differences among the ultramutated adult samples and remaining HGGs, we compared the age at diagnosis. The average age in 4 adult HGGs with *POLE* mutation was 35.5, whereas the non-ultramutated HGGs in Yale cohort was 58 (range =[23-42] vs. [22-83]). The two-tailed t-test was used to calculate the p-value of 0.005. The median age for anaplastic astrocytomas and glioblastomas is reported as 54 and 64, respectively<sup>16</sup>.



## FIGURES:

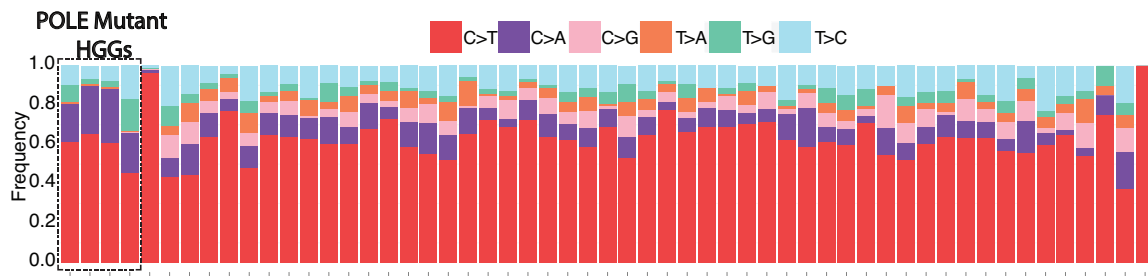

### Supplementary Figure S1: Mutation Spectrum for 55 primary HGGs.

Each of the 55 tumor samples are plotted along the horizontal axis. Analysis of mutation signatures, as determined by the relative percentage of all 6 possible types of single nucleotide mutation types. The ultramutated samples, which cluster to the left side of the panel and marked by the box, are characterized by an increased percentage of C>A mutations and decreased C>G and T>G as compared to the other samples.

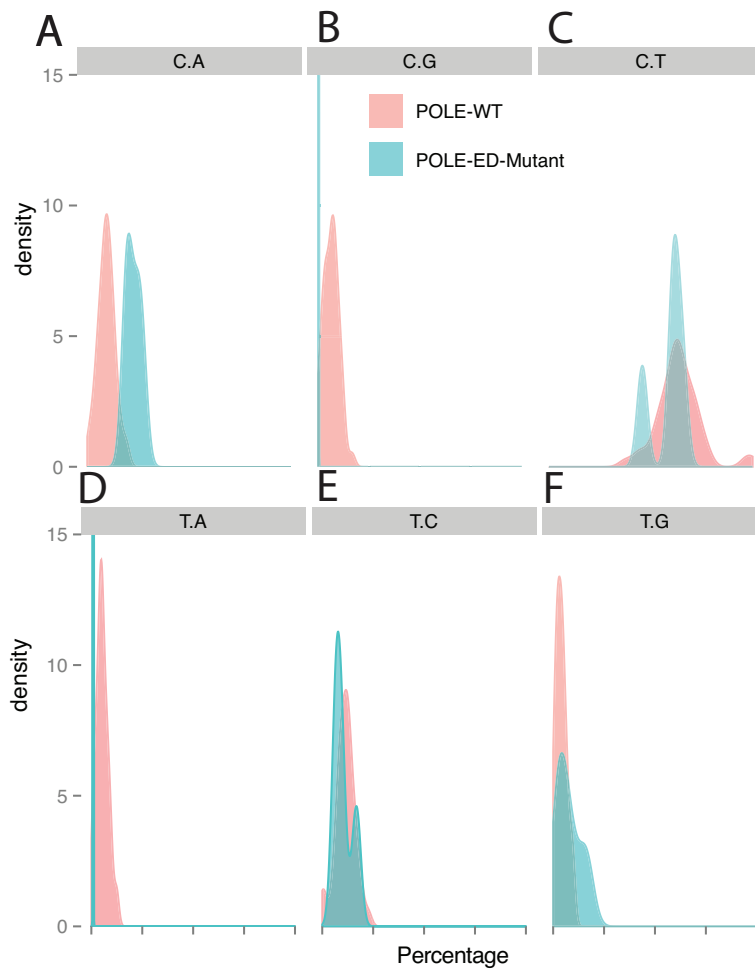

### Supplementary Figure S2: Mutation signature distribution in 55 primary HGGs

Density distribution of the 6 classes of mutation in 2 groups of samples, *POLE* mutant ultramutated HGGs (*POLE*-ED-Mutant) and the rest (*POLE*-WT). Ultramutated HGGs have an increased C > A transversion ratio (A). Interestingly, *POLE* mutant samples show a significantly low ratios of C > G (B) and T > A transversions (D). C > T (C), T > C transitions (E) and T > G (F) transversions show a similar distribution for both groups.

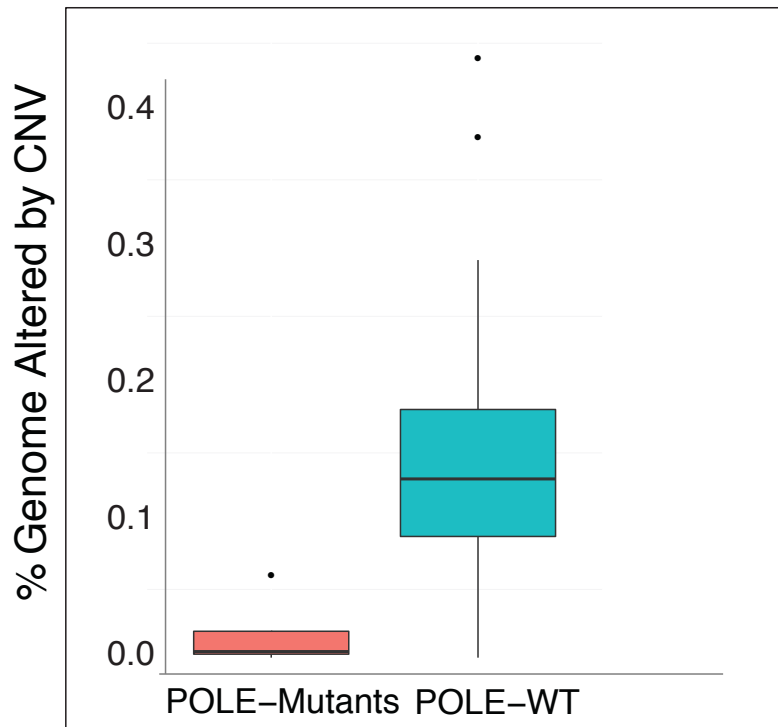

**Supplementary Figure S3: Distribution of percentage of genome alteration by CNV events.**

*POLE*-Mutant samples include 2 adult and 2 pediatric samples and the *POLE*-WT samples are the remaining 51 adult primary HGGs in Yale cohort. ( $P = 9.575e-05$ , two-sided t-test).

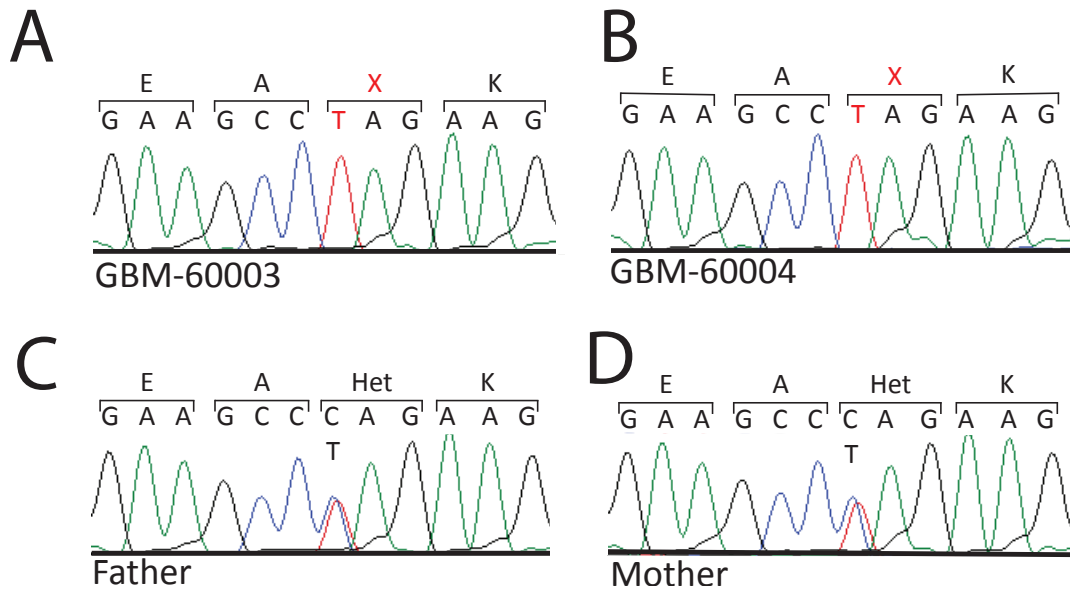

**Supplementary Figure S4: Sanger confirmation for the germline homozygous *MSH6* in pediatric GBM cases**

Sanger confirmation for the germline homozygous *MSH6* mutation in pediatric GBM cases (A-B) and their parents (C-D) are shown. The mutation identified via whole-exome sequencing was confirmed as being homozygous in the two affected siblings and heterozygous in their parents. The bases outlined in red in the sequence indicate the mutated base pairs.

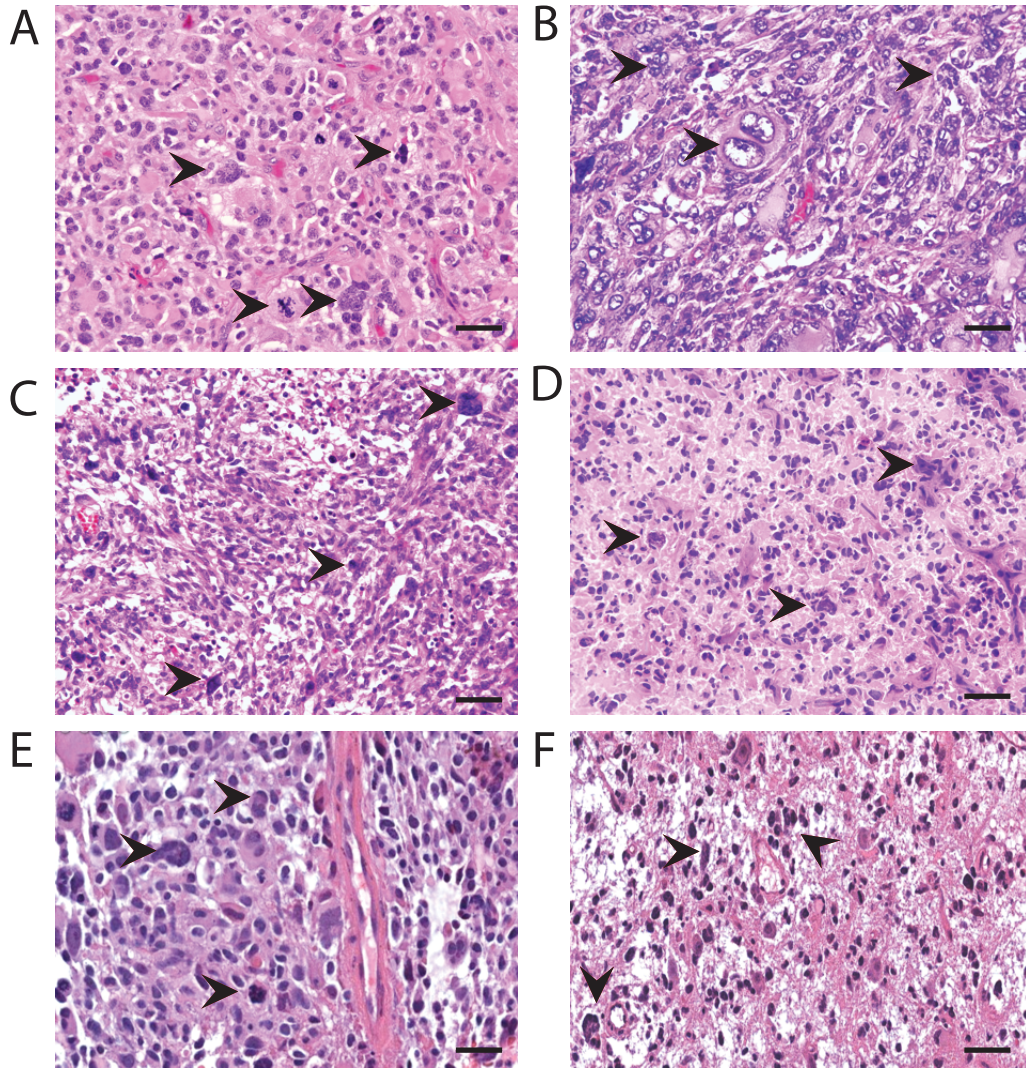

**Supplementary Figure S5: H&E stained sections of 6 *POLE* mutant cases**

H&E stained sections show numerous large multinucleated giant cells with clumped nuclei, and cells with many smaller, eccentrically placed nuclei (black arrowheads) for (A) GBM-60001, (B) GBM-60004, (C) GBM-60003, (D) GBM-10468, (E)-(F) TCGA cases. Scale bars = 50 $\mu$ m.

### Overall Survival for IDH1 WT Gliomas

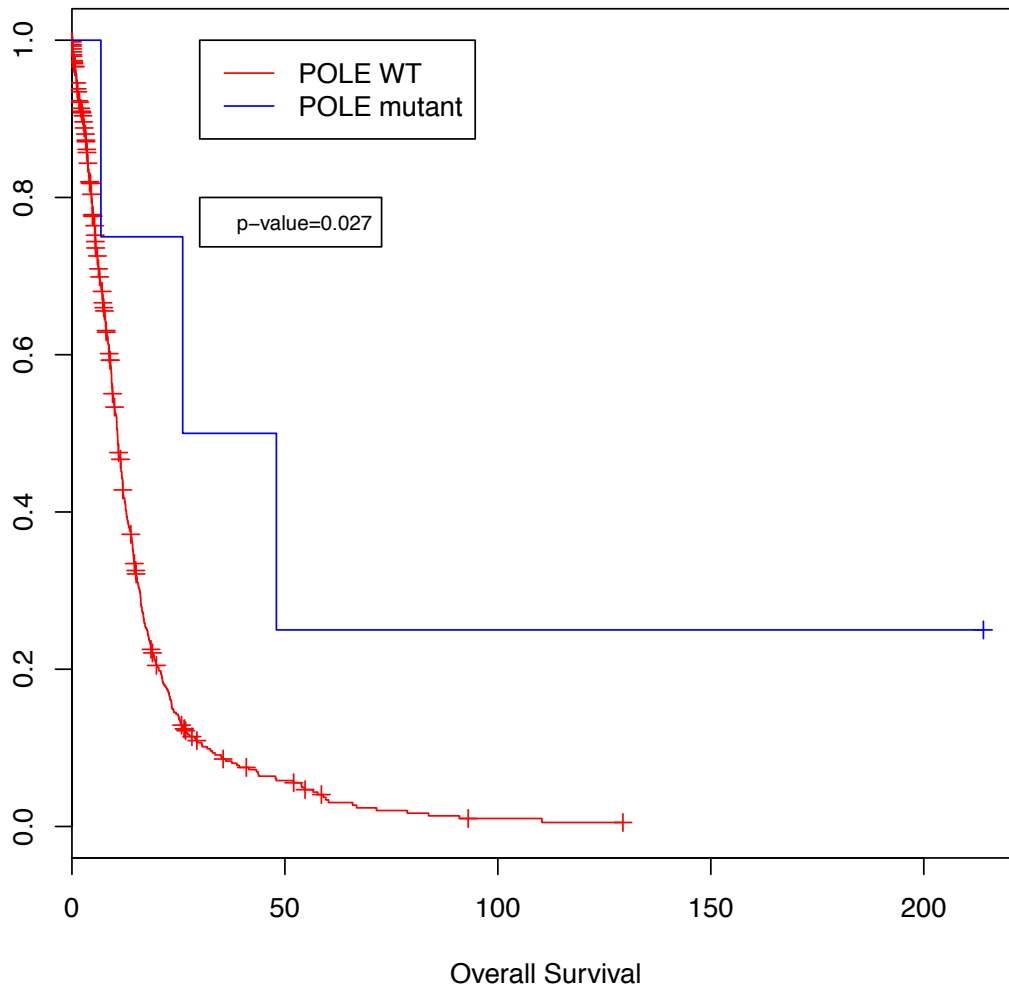

### Supplementary Figure S6: Time to recurrence analysis with the TCGA GBM dataset (n=569)

Time to recurrence analysis using the public TCGA data (n=567) and the *POLE* mutant Yale adult samples (n=2), with total samples size of 569. The p-value ( $p = 0.026$ ) calculated to assess the significance of difference in the time of recurrence between *POLE* mutant and wildtype samples is the same as reported with the Yale discovery cohort (n=53).

### Overall Survival for IDH1 WT Gliomas

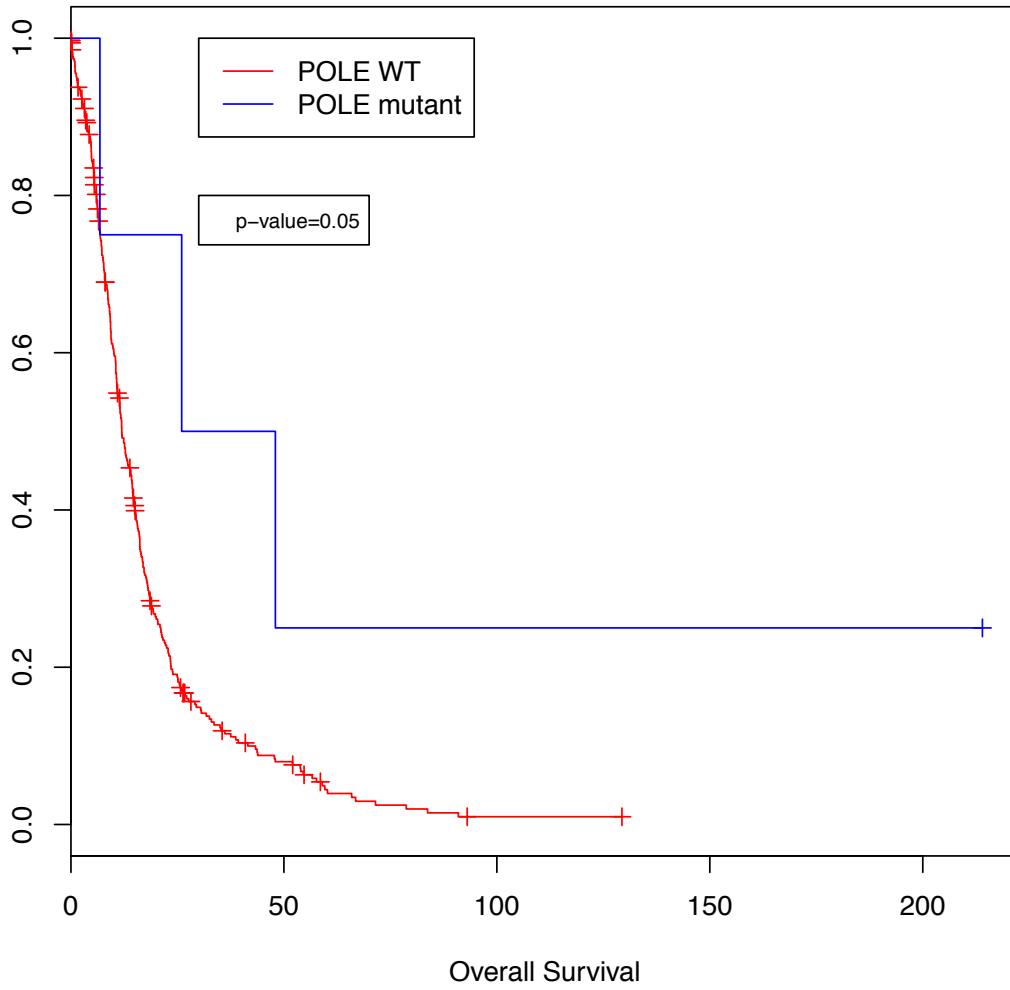

**Supplementary Figure S7: Time to recurrence analysis with the TCGA GBM dataset with samples younger than 64 (n=365)**

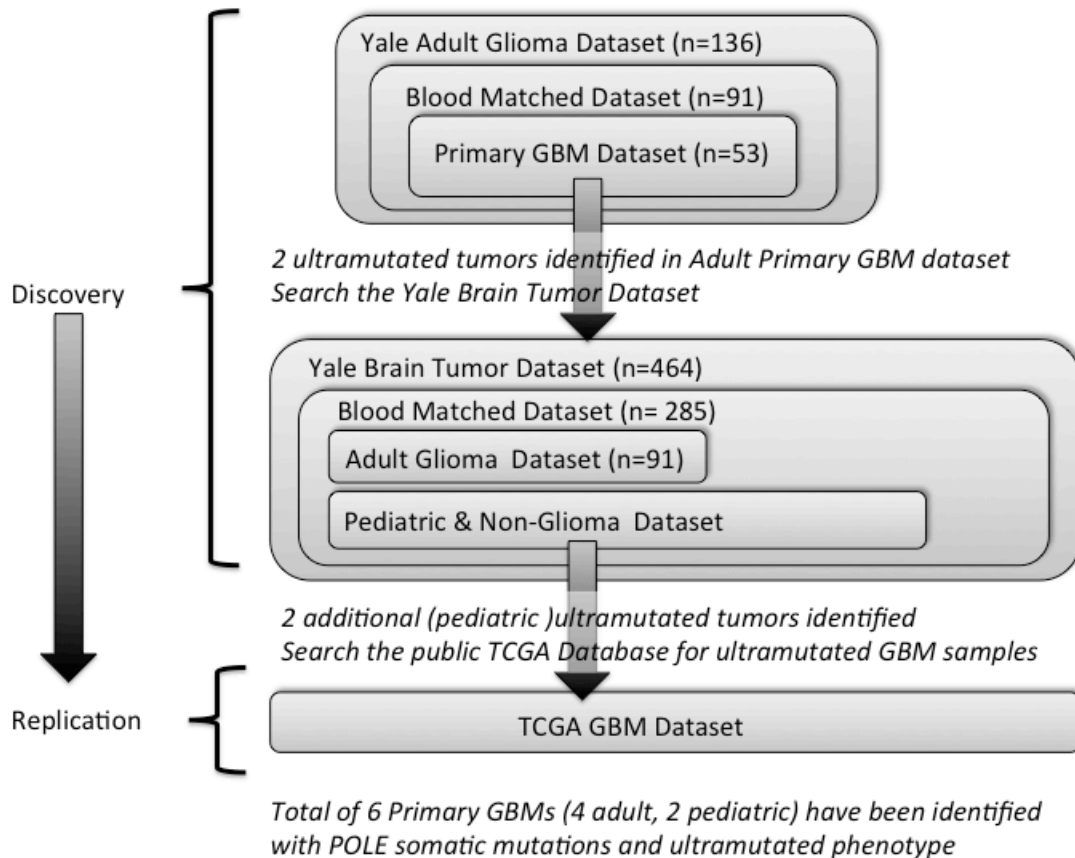

**Supplementary Figure S8: Flow chart for the identification of POLE mutated ultramutated gliomas.**



## References:

1. Bilguvar K, Ozturk AK, Louvi A, et al. Whole-exome sequencing identifies recessive WDR62 mutations in severe brain malformations. *Nature*. 2010; 467(7312):207-210.
2. Clark VE, Erson-Omay EZ, Serin A, et al. Genomic Analysis of Non-NF2 Meningiomas Reveals Mutations in TRAF7, KLF4, AKT1, and SMO. *Science*. 2013; 339(6123):1077-1080.
3. Li H, Durbin R. Fast and accurate short read alignment with Burrows–Wheeler transform. *Bioinformatics*. 2009; 25(14):1754-1760.
4. Lunter G, Goodson L. Stampy: a statistical algorithm for sensitive and fast mapping of Illumina sequence reads. *Genome Research*. 2011.
5. DePristo MA, Banks E, Poplin R, et al. A framework for variation discovery and genotyping using next-generation DNA sequencing data. *Nat Genet*. 2011; 43(5):491-498.
6. Li H. A statistical framework for SNP calling, mutation discovery, association mapping and population genetical parameter estimation from sequencing data. *Bioinformatics*. 2011; 27(21):2987-2993.
7. Kumar P, Henikoff S, Ng PC. Predicting the effects of coding non-synonymous variants on protein function using the SIFT algorithm. *Nature protocols*. 2009; 4(7):1073-1081.
8. Adzhubei IA, Schmidt S, Peshkin L, et al. A method and server for predicting damaging missense mutations. *Nat Methods*. 2010; 7(4):248-249.
9. Consortium TGP. An integrated map of genetic variation from 1,092 human genomes. *Nature*. 2012; 491(7422):56-65.
10. Sathirapongsasuti JF, Lee H, Horst BAJ, et al. Exome Sequencing-Based Copy-Number Variation and Loss of Heterozygosity Detection: ExomeCNV. *Bioinformatics*. 2011.
11. Song S, Nones K, Miller D, et al. qpure: A Tool to Estimate Tumor Cellularity from Genome-Wide Single-Nucleotide Polymorphism Profiles. *PLoS ONE*. 2012; 7(9):e45835.
12. Nik-Zainal S, Van†Loo P, Wedge DC, et al. The Life History of 21 Breast Cancers. *Cell*. 2012; 149(5):994-1007.
13. Yates LR, Campbell PJ. Evolution of the cancer genome. *Nat Rev Genet*. 2012; 13(11):795-806.
14. Stephens PJ, Tarpey PS, Davies H, et al. The landscape of cancer genes and mutational processes in breast cancer. *Nature*. 2012; 486(7403):400-404.
15. Therneau TMG, Patricia M. *Modeling Survival Data: Extending the Cox Model*: New York; 2000.
16. Ostrom QT, Gittleman H, Farah P, et al. CBTRUS Statistical Report: Primary Brain and Central Nervous System Tumors Diagnosed in the United States in 2006-2010. *Neuro-Oncology*. 2013; 15(suppl 2):ii1-ii56.

## TABLES

**Table S1. Sequencing metrics for 55 primary HGG cases from the Yale cohort.** Sequencing metrics for 55 primary (i.e. wildtype for *IDH1-R132*) HGG cases from the Yale cohort are listed. *POLE* mutant ultramutated cases are marked with red fonts

| Sample ID        | % Mismatches | Mean Target Coverage | % Target Bases at 20x |
|------------------|--------------|----------------------|-----------------------|
| <b>GBM-60001</b> | <b>0.21%</b> | 233.69               | <b>94.91%</b>         |
| <b>GBM-60003</b> | <b>0.30%</b> | 153.08               | <b>93.58%</b>         |
| <b>GBM-60004</b> | <b>0.25%</b> | 197.51               | <b>93.68%</b>         |
| <b>GBM-10468</b> | <b>0.34%</b> | 281.31               | <b>94.59%</b>         |
| GBM-20032        | 0.28%        | 227.65               | 94.10%                |
| GBM-10457        | 0.13%        | 153.54               | 92.59%                |
| GBM-30239        | 0.15%        | 196.62               | 93.67%                |
| GBM-30056        | 0.27%        | 280.11               | 94.53%                |
| GBM-30021        | 0.33%        | 209.87               | 92.06%                |
| GBM-10352        | 0.61%        | 181.85               | 89.44%                |
| GBM-39035_1      | 0.26%        | 209.51               | 91.35%                |
| GBM-30092        | 0.24%        | 296.38               | 94.21%                |
| GBM-10448        | 0.35%        | 245.30               | 94.22%                |
| GBM-30099        | 0.24%        | 182.19               | 92.13%                |
| GBM-20016        | 0.32%        | 212.30               | 91.34%                |
| GBM-20045        | 0.22%        | 258.04               | 94.76%                |
| GBM-30059        | 0.27%        | 251.67               | 93.37%                |
| GBM-20030        | 0.38%        | 100.19               | 89.36%                |
| GBM-10449        | 0.29%        | 237.74               | 93.98%                |
| GBM-20034        | 0.36%        | 255.76               | 93.45%                |
| GBM-20010        | 0.28%        | 232.23               | 92.85%                |
| GBM-20012        | 0.32%        | 208.95               | 91.72%                |
| GBM-20017        | 0.30%        | 298.13               | 94.31%                |
| GBM-30143        | 0.25%        | 319.48               | 95.41%                |
| GBM-10265        | 0.28%        | 233.96               | 93.32%                |
| GBM-20048        | 0.25%        | 201.42               | 93.32%                |

|                  |       |        |        |
|------------------|-------|--------|--------|
| <b>GBM-10450</b> | 0.27% | 141.69 | 87.84% |
| <b>GBM-30026</b> | 0.28% | 246.06 | 92.19% |
| <b>GBM-10365</b> | 0.22% | 175.76 | 90.21% |
| <b>GBM-20044</b> | 0.22% | 263.81 | 94.08% |
| <b>GBM-20031</b> | 0.29% | 193.65 | 90.70% |
| <b>GBM-30109</b> | 0.59% | 213.27 | 94.00% |
| <b>GBM-10132</b> | 0.28% | 254.76 | 94.01% |
| <b>GBM-20050</b> | 0.21% | 271.86 | 94.91% |
| <b>GBM-30031</b> | 0.33% | 184.70 | 90.99% |
| <b>GBM-39003</b> | 0.15% | 126.96 | 89.44% |
| <b>GBM-30107</b> | 0.56% | 199.94 | 93.27% |
| <b>GBM-10269</b> | 0.32% | 185.05 | 91.27% |
| <b>GBM-10474</b> | 0.21% | 289.94 | 95.24% |
| <b>GBM-10355</b> | 0.21% | 180.47 | 90.02% |
| <b>GBM-20006</b> | 0.33% | 228.37 | 91.80% |
| <b>GBM-10461</b> | 0.32% | 236.99 | 94.14% |
| <b>GBM-30118</b> | 0.57% | 247.09 | 94.52% |
| <b>GBM-30142</b> | 0.25% | 341.20 | 95.54% |
| <b>GBM-30028</b> | 0.24% | 241.55 | 93.03% |
| <b>GBM-10400</b> | 0.19% | 139.06 | 87.13% |
| <b>GBM-30029</b> | 0.26% | 289.97 | 93.98% |
| <b>GBM-20013</b> | 0.20% | 202.30 | 91.32% |
| <b>GBM-39005</b> | 0.17% | 152.01 | 90.43% |
| <b>GBM-20028</b> | 0.56% | 72.44  | 81.53% |
| <b>GBM-30111</b> | 0.93% | 176.66 | 92.49% |
| <b>GBM-20043</b> | 0.38% | 124.13 | 90.36% |
| <b>GBM-20041</b> | 0.19% | 134.63 | 87.83% |
| <b>GBM-10333</b> | 0.35% | 155.10 | 92.15% |
| <b>GBM-20051</b> | 0.21% | 285.80 | 95.04% |

**Table S2. Mutation signature data**

Mutation Signature data for 55 primary HGG (i.e. wildtype for *IDH1-R132*) cases from Yale and 2 *POLE* mutant cases from TCGA are listed. *POLE* mutant ultramutated cases are marked with red fonts.

| Sample ID           | C>T    | C>A    | C>G    | T>A    | T>G    | T>C    |
|---------------------|--------|--------|--------|--------|--------|--------|
| <b>GBM-60004</b>    | 61.16% | 27.07% | 0.10%  | 0.81%  | 3.31%  | 7.56%  |
| <b>TCGA-06-5416</b> | 61.87% | 25.11% | 0.23%  | 0.68%  | 4.35%  | 7.76%  |
| <b>TCGA-DU-6392</b> | 59.09% | 25.06% | 0.34%  | 1.47%  | 3.27%  | 10.77% |
| <b>GBM-60003</b>    | 65.58% | 24.18% | 0.11%  | 0.82%  | 2.90%  | 6.41%  |
| <b>GBM-10468</b>    | 45.83% | 20.12% | 0.21%  | 0.91%  | 16.13% | 16.80% |
| <b>GBM-10474</b>    | 58.82% | 19.61% | 7.84%  | 1.96%  | 1.96%  | 9.80%  |
| <b>GBM-60001</b>    | 61.32% | 19.21% | 0.22%  | 1.01%  | 8.43%  | 9.80%  |
| <b>GBM-10333</b>    | 37.50% | 18.75% | 12.50% | 6.25%  | 6.25%  | 18.75% |
| <b>GBM-30239</b>    | 44.57% | 16.00% | 10.86% | 9.71%  | 4.57%  | 14.29% |
| <b>GBM-20013</b>    | 56.00% | 16.00% | 10.00% | 6.00%  | 6.00%  | 6.00%  |
| <b>GBM-10449</b>    | 55.34% | 15.53% | 9.71%  | 2.91%  | 3.88%  | 12.62% |
| <b>GBM-20010</b>    | 65.17% | 13.48% | 1.12%  | 12.36% | 2.25%  | 5.62%  |
| <b>GBM-30059</b>    | 67.91% | 13.43% | 4.48%  | 4.48%  | 2.24%  | 7.46%  |
| <b>GBM-30099</b>    | 60.40% | 13.42% | 4.03%  | 4.03%  | 9.40%  | 8.72%  |
| <b>GBM-10461</b>    | 55.00% | 13.33% | 16.67% | 5.00%  | 0.00%  | 10.00% |
| <b>GBM-30107</b>    | 62.32% | 13.04% | 2.90%  | 1.45%  | 2.90%  | 17.39% |
| <b>GBM-20034</b>    | 52.11% | 12.68% | 7.04%  | 9.86%  | 2.82%  | 15.49% |
| <b>GBM-20030</b>    | 58.75% | 12.50% | 7.50%  | 8.75%  | 1.25%  | 11.25% |
| <b>GBM-10265</b>    | 63.74% | 12.09% | 7.69%  | 5.49%  | 1.10%  | 9.89%  |
| <b>GBM-30056</b>    | 64.05% | 11.76% | 6.54%  | 5.88%  | 3.27%  | 8.50%  |
| <b>GBM-39035_1</b>  | 64.76% | 11.43% | 5.71%  | 2.86%  | 1.90%  | 13.33% |
| <b>GBM-30092</b>    | 64.00% | 11.00% | 7.00%  | 5.00%  | 4.00%  | 9.00%  |
| <b>GBM-10352</b>    | 48.35% | 10.99% | 6.59%  | 9.89%  | 6.59%  | 17.58% |
| <b>GBM-30118</b>    | 64.06% | 10.94% | 1.56%  | 4.69%  | 6.25%  | 12.50% |
| <b>GBM-20044</b>    | 53.03% | 10.61% | 10.61% | 7.58%  | 9.09%  | 9.09%  |
| <b>GBM-10448</b>    | 62.86% | 10.48% | 0.95%  | 8.57%  | 0.95%  | 16.19% |
| <b>GBM-30143</b>    | 72.41% | 10.34% | 5.75%  | 3.45%  | 1.15%  | 6.90%  |
| <b>GBM-10450</b>    | 58.57% | 10.00% | 8.57%  | 7.14%  | 4.29%  | 11.43% |

|                  |         |        |        |        |        |        |
|------------------|---------|--------|--------|--------|--------|--------|
| <b>GBM-20041</b> | 75.00%  | 10.00% | 0.00%  | 5.00%  | 10.00% | 0.00%  |
| <b>GBM-10132</b> | 69.01%  | 9.86%  | 2.82%  | 7.04%  | 0.00%  | 11.27% |
| <b>GBM-30026</b> | 68.67%  | 9.64%  | 1.20%  | 1.20%  | 6.02%  | 13.25% |
| <b>GBM-10457</b> | 43.67%  | 9.31%  | 12.03% | 4.22%  | 10.55% | 20.22% |
| <b>GBM-10365</b> | 64.94%  | 9.09%  | 3.90%  | 5.19%  | 3.90%  | 12.99% |
| <b>GBM-30028</b> | 60.44%  | 8.79%  | 8.79%  | 3.30%  | 5.49%  | 13.19% |
| <b>GBM-30142</b> | 52.17%  | 8.70%  | 10.14% | 8.70%  | 4.35%  | 15.94% |
| <b>GBM-20016</b> | 60.58%  | 8.65%  | 7.69%  | 7.69%  | 4.81%  | 10.58% |
| <b>GBM-20048</b> | 62.20%  | 8.54%  | 6.10%  | 4.88%  | 4.88%  | 13.41% |
| <b>GBM-20050</b> | 69.01%  | 8.45%  | 7.04%  | 1.41%  | 2.82%  | 11.27% |
| <b>GBM-10400</b> | 63.33%  | 8.33%  | 6.67%  | 3.33%  | 3.33%  | 15.00% |
| <b>GBM-39005</b> | 63.33%  | 8.33%  | 11.67% | 8.33%  | 1.67%  | 6.67%  |
| <b>GBM-10355</b> | 60.00%  | 8.00%  | 4.00%  | 5.33%  | 8.00%  | 14.67% |
| <b>GBM-10269</b> | 61.25%  | 7.50%  | 7.50%  | 5.00%  | 7.50%  | 11.25% |
| <b>GBM-30109</b> | 66.28%  | 6.98%  | 3.49%  | 6.98%  | 6.98%  | 9.30%  |
| <b>GBM-30031</b> | 71.67%  | 6.67%  | 8.33%  | 3.33%  | 0.00%  | 10.00% |
| <b>GBM-30021</b> | 77.17%  | 6.30%  | 3.15%  | 7.09%  | 2.36%  | 3.94%  |
| <b>GBM-20045</b> | 73.00%  | 6.00%  | 3.00%  | 5.00%  | 5.00%  | 8.00%  |
| <b>GBM-30029</b> | 56.72%  | 5.97%  | 8.96%  | 4.48%  | 5.97%  | 17.91% |
| <b>GBM-20012</b> | 72.62%  | 5.95%  | 5.95%  | 1.19%  | 2.38%  | 11.90% |
| <b>GBM-20028</b> | 60.00%  | 5.71%  | 2.86%  | 5.71%  | 2.86%  | 22.86% |
| <b>GBM-39003</b> | 70.42%  | 5.63%  | 4.23%  | 7.04%  | 4.23%  | 8.45%  |
| <b>GBM-20017</b> | 68.82%  | 4.30%  | 9.68%  | 2.15%  | 2.15%  | 12.90% |
| <b>GBM-20043</b> | 54.17%  | 4.17%  | 12.50% | 12.50% | 4.17%  | 12.50% |
| <b>GBM-20031</b> | 77.63%  | 3.95%  | 5.26%  | 3.95%  | 1.32%  | 7.89%  |
| <b>GBM-20006</b> | 71.19%  | 3.39%  | 3.39%  | 1.69%  | 8.47%  | 11.86% |
| <b>GBM-30111</b> | 65.22%  | 2.17%  | 8.70%  | 4.35%  | 4.35%  | 15.22% |
| <b>GBM-20032</b> | 96.65%  | 1.28%  | 0.49%  | 0.30%  | 0.06%  | 1.22%  |
| <b>GBM-20051</b> | 100.00% | 0.00%  | 0.00%  | 0.00%  | 0.00%  | 0.00%  |

**Table S3. Clinical information for 55 primary HGG (i.e. wildtype for *IDH1-R132*) cases from the Yale cohort.**

*POLE* mutant ultramutated cases are marked with red font. Status for deleterious germline MSH6 and somatic *POLE* mutations are reported.

Hom. = Homozygous mutation, WT= mutation not found.

| Sample ID | Age at DX | Diagnosis         | Grade | DFS Status | DFS | OS Status | OS Months | Count of Protein alt. Mutations | Count of Syn. Mutations | % Genome alteration by CNV Events | Germline MSH6 Mutation | Somatic <i>POLE</i> Mutation |
|-----------|-----------|-------------------|-------|------------|-----|-----------|-----------|---------------------------------|-------------------------|-----------------------------------|------------------------|------------------------------|
| GBM-60001 | 42        | GBM               | IV    | Yes        | 48  | Deceased  | 48        | 7527                            | 2493                    | 6.09%                             | V379A, Hom.            | V411L                        |
| GBM-60003 | 8         | GBM               | IV    | Yes        | 24  | Deceased  | 30        | 4861                            | 57                      | 0.55%                             | Q160*, Hom             | S297F                        |
| GBM-60004 | 2         | GBM               | IV    | No         | 6   | Deceased  | 6         | 4780                            | 33                      | 0.00%                             | Q160*, Hom             | S459F                        |
| GBM-10468 | 42        | GBM               | IV    | Yes        | 26  | Alive     | 28        | 4652                            | 1522                    | 0.34%                             | WT                     | P286R                        |
| GBM-20032 | NA        | GBM               | IV    | Yes        | 3   | Alive     | 15        | 659                             | 364                     | 16.37%                            | WT                     | WT                           |
| GBM-10457 | 51        | anaplastic oligo. | III   | NA         | NA  | Alive     | 10        | 121                             | 31                      | 13.99%                            | WT                     | WT                           |
| GBM-30239 | 59        | GBM               | IV    | NA         | NA  | Hospice   | 4         | 77                              | 31                      | 27.15%                            | WT                     | WT                           |
| GBM-30056 | 54        | GBM               | IV    | NA         | 7   | NA        | 13        | 75                              | 23                      | 38.10%                            | WT                     | WT                           |
| GBM-30021 | 76        | GBM               | IV    | Yes        | 15  | Hospice   | 15        | 74                              | 18                      | 14.22%                            | WT                     | WT                           |
| GBM-10352 | 47        | GBM               | IV    | Yes        | 11  | Deceased  | 20        | 67                              | 26                      | 17.63%                            | WT                     | WT                           |
| GBM-10355 | 52        | NA                | IV    | NA         | NA  | NA        | NA        | 66                              | 16                      | 17.90%                            | WT                     | WT                           |

|                  |    |     |    |     |    |          |    |    |    |        |    |    |
|------------------|----|-----|----|-----|----|----------|----|----|----|--------|----|----|
| <b>GBM-30092</b> | 52 | GBM | IV | NA  | NA | NA       | 11 | 64 | 22 | 19.52% | WT | WT |
| <b>GBM-10448</b> | 68 | GBM | IV | NA  | NA | Deceased | 8  | 61 | 22 | 14.64% | WT | WT |
| <b>GBM-30099</b> | 72 | GBM | IV | NA  | NA | NA       | 25 | 57 | 33 | 19.52% | WT | WT |
| <b>GBM-20016</b> | 59 | GBM | IV | Yes | 7  | Alive    | 17 | 55 | 16 | 16.22% | WT | WT |
| <b>GBM-20045</b> | NA | GBM | IV | Yes | 2  | Alive    | 17 | 55 | 11 | 9.12%  | WT | WT |
| <b>GBM-30059</b> | 73 | GBM | IV | NA  | NA | NA       | NA | 55 | 26 | 8.51%  | WT | WT |
| <b>GBM-20030</b> | 59 | GBM | IV | Yes | 16 | Alive    | 20 | 53 | 27 | 8.64%  | WT | WT |
| <b>GBM-10449</b> | 51 | GBM | IV | Yes | 6  | Alive    | 10 | 52 | 21 | 20.62% | WT | WT |
| <b>GBM-20034</b> | 53 | GBM | IV | Yes | 8  | Deceased | 22 | 49 | 22 | 13.58% | WT | WT |
| <b>GBM-20010</b> | 49 | GBM | IV | Yes | 6  | Alive    | 21 | 49 | 14 | 13.05% | WT | WT |
| <b>GBM-20012</b> | 55 | GBM | IV | Yes | 3  | Alive    | 18 | 45 | 17 | 14.22% | WT | WT |
| <b>GBM-20017</b> | NA | GBM | IV | Yes | NA | NA       | NA | 45 | 16 | 12.82% | WT | WT |
| <b>GBM-30143</b> | 63 | GBM | IV | No  | 6  | Alive    | 6  | 44 | 18 | 8.10%  | WT | WT |
| <b>GBM-10265</b> | 49 | GBM | IV | Yes | 5  | Deceased | 28 | 42 | 14 | 21.53% | WT | WT |
| <b>GBM-20048</b> | NA | GBM | IV | Yes | 8  | Alive    | 12 | 42 | 13 | 14.40% | WT | WT |

|                  |    |                                         |     |     |    |          |    |    |    |        |    |    |
|------------------|----|-----------------------------------------|-----|-----|----|----------|----|----|----|--------|----|----|
| <b>GBM-10450</b> | 68 | GBM                                     | IV  | Yes | 3  | Deceased | 10 | 39 | 8  | 43.89% | WT | WT |
| <b>GBM-30026</b> | 55 | GBM                                     | IV  | No  | 15 | NA       | 15 | 39 | 23 | 18.46% | WT | WT |
| <b>GBM-10365</b> | 66 | GBM,<br>oligo.                          | IV  | Yes | 7  | Deceased | 19 | 37 | 18 | 13.56% | WT | WT |
| <b>GBM-20044</b> | NA | GBM                                     | IV  | Yes | 3  | Alive    | 5  | 37 | 10 | 29.12% | WT | WT |
| <b>GBM-20031</b> | 64 | GBM                                     | IV  | Yes | 8  | Deceased | 8  | 37 | 10 | 12.78% | WT | WT |
| <b>GBM-30109</b> | 56 | GBM                                     | IV  | Yes | 11 | Hospice  | 11 | 36 | 14 | 13.90% | WT | WT |
| <b>GBM-10132</b> | 60 | GBM                                     | IV  | Yes | 3  | Alive    | 49 | 35 | 19 | 26.80% | WT | WT |
| <b>GBM-20050</b> | NA | GBM                                     | IV  | Yes | 4  | Alive    | 10 | 35 | 20 | 12.37% | WT | WT |
| <b>GBM-30031</b> | 68 | Anaplastic<br>oligo-<br>astrocyto<br>ma | III | NA  | NA | NA       | 12 | 35 | 9  | 8.57%  | WT | WT |
| <b>GBM-39003</b> | 83 | GBM                                     | IV  | NA  | NA | NA       | 2  | 35 | 16 | 7.70%  | WT | WT |
| <b>GBM-30107</b> | 76 | GBM                                     | IV  | Yes | 7  | Alive    | 18 | 34 | 15 | 0.00%  | WT | WT |
| <b>GBM-10269</b> | 49 | GBM,<br>oligo.                          | IV  | No  | 24 | Alive    | 24 | 32 | 17 | 28.46% | WT | WT |
| <b>GBM-10474</b> | 47 | GBM                                     | IV  | Yes | 14 | Alive    | 17 | 32 | 11 | 26.23% | WT | WT |
| <b>GBM-10355</b> | 54 | GBM                                     | IV  | Yes | 3  | Deceased | 17 | 31 | 16 | 9.57%  | WT | WT |



|                  |    |                   |     |     |    |          |    |    |    |        |    |    |
|------------------|----|-------------------|-----|-----|----|----------|----|----|----|--------|----|----|
| <b>GBM-20006</b> | 64 | GBM               | IV  | Yes | 1  | Deceased | 26 | 31 | 8  | 0.93%  | WT | WT |
| <b>GBM-10461</b> | 63 | anaplastic oligo. | III | No  | 10 | Alive    | 10 | 30 | 7  | 25.11% | WT | WT |
| <b>GBM-30118</b> | 42 | GBM               | IV  | Yes | 10 | NA       | 14 | 30 | 17 | 10.11% | WT | WT |
| <b>GBM-30142</b> | 70 | GBM               | IV  | NA  | NA | NA       | 4  | 30 | 15 | 12.08% | WT | WT |
| <b>GBM-30028</b> | 69 | GBM               | IV  | NA  | NA | Hospice  | 4  | 30 | 25 | 12.98% | WT | WT |
| <b>GBM-10400</b> | 61 | GBM               | IV  | NA  | NA | Deceased | 15 | 26 | 14 | 11.50% | WT | WT |
| <b>GBM-30029</b> | 62 | GBM               | IV  | NA  | NA | NA       | 4  | 26 | 12 | 5.08%  | WT | WT |
| <b>GBM-20013</b> | 60 | GBM               | IV  | Yes | 12 | Deceased | 12 | 26 | 10 | 5.78%  | WT | WT |
| <b>GBM-39005</b> | 48 | GBM               | IV  | NA  | NA | NA       | NA | 26 | 13 | 11.89% | WT | WT |
| <b>GBM-20028</b> | 63 | GBM               | IV  | Yes | 6  | Deceased | 28 | 23 | 5  | 12.71% | WT | WT |
| <b>GBM-30111</b> | 65 | GBM               | IV  | No  | 17 | Alive    | 17 | 18 | 14 | 13.09% | WT | WT |
| <b>GBM-20043</b> | 22 | GBM               | IV  | Yes | 6  | Deceased | 26 | 16 | 3  | 7.11%  | WT | WT |
| <b>GBM-20041</b> | 62 | GBM               | IV  | Yes | 10 | Alive    | 21 | 8  | 3  | 0.80%  | WT | WT |
| <b>GBM-10333</b> | 50 | GBM               | IV  | Yes | NA | Alive    | 28 | 7  | 3  | 4.87%  | WT | WT |
| <b>GBM-20051</b> | NA | GBM               | IV  | Yes | 2  | Alive    | 11 | 1  | 0  | 0.07%  | WT | WT |

**Table S4. Mutational profile for all HGGs in Yale cohort (53 adults and 2 pediatric cases).**

The CNVs and protein altering SNP/INDEL status for the genes that are frequently altered in GBMs are listed. (MUT= SNPs and INDELS with the amino acid change, WT= Wildtype, AMPLIFICATION, DELETION =CNV events.)

| Frequently Altered Genes in GBMs |                                                |                                                  |               |               |                                |              |               |                               |                               |               |
|----------------------------------|------------------------------------------------|--------------------------------------------------|---------------|---------------|--------------------------------|--------------|---------------|-------------------------------|-------------------------------|---------------|
| ID                               | TP53                                           | NF1                                              | EGFR          | CDKN2A        | PDGFRA                         | PTEN         | MDM2          | CDK4                          | PIK3R1                        | PIK3CA        |
| GBM-60004                        | MUT:p.306R/*,<br>MUT:p.273R/C                  | MUT:p.192R/*                                     | WT            | WT            | MUT:p.987A/V                   | WT           | WT            | WT                            | WT                            | MUT:p.957T/I  |
| GBM-60003                        | MUT:p.283R/C                                   | MUT:p.119H/P,<br>MUT:p.2151L/P,<br>MUT:p.2214E/D | WT            | WT            | WT                             | MUT:p.166V/L | WT            | WT                            | WT                            | WT            |
| GBM-10457                        | WT                                             | DELETION                                         | AMPLIFICATION | WT            | WT                             | DELETION     | WT            | WT                            | WT                            | WT            |
| GBM-10461                        | WT                                             | WT                                               | AMPLIFICATION | DELETION      | WT                             | DELETION     | DELETION      | WT                            | WT                            | WT            |
| GBM-10468                        | MUT:p.342R/*                                   | MUT:p.,<br>MUT:p.2718F/C                         | MUT:p.675R/Q  | MUT:p.70F/C   | MUT:p.398N/I,<br>MUT:p.1042S/L | MUT:p.68Y/H  | WT            | WT                            | MUT:p.119E/K,<br>MUT:p.429S/Y | WT            |
| GBM-10333                        | WT                                             | DELETION                                         | AMPLIFICATION | AMPLIFICATION | WT                             | WT           | WT            | WT                            | WT                            | WT            |
| GBM-10269                        | WT                                             | AMPLIFICATION                                    | AMPLIFICATION | DELETION      | AMPLIFICATION                  | DELETION     | AMPLIFICATION | AMPLIFICATION                 | WT                            | MUT:p.1043M/T |
| GBM-10474                        | WT                                             | WT                                               | AMPLIFICATION | DELETION      | WT                             | WT           | WT            | WT                            | WT                            | WT            |
| GBM-10352                        | WT                                             | WT                                               | AMPLIFICATION | DELETION      | WT                             | DELETION     | WT            | WT                            | WT                            | WT            |
| GBM-60001                        | MUT:p.273R/C,<br>MUT:p.213R/Q,<br>MUT:p.124C/R | MUT:p.1362R/*,<br>MUT:p.1676A/T                  | WT            | WT            | MUT:p.561V/A,<br>MUT:p.937P/Q  | WT           | WT            | MUT:p.267S/L,<br>MUT:p.135R/C | MUT:p.412S/Y                  | MUT:p.88R/Q   |

|                  |                           |               |               |          |               |               |               |               |                   |            |
|------------------|---------------------------|---------------|---------------|----------|---------------|---------------|---------------|---------------|-------------------|------------|
| <b>GBM-20010</b> | WT                        | WT            | AMPLIFICATION | WT       | WT            | DELETION      | AMPLIFICATION | AMPLIFICATION | WT                | WT         |
| <b>GBM-20012</b> | MUT:p.282R/W              | WT            | AMPLIFICATION | DELETION | WT            | DELETION      | WT            | AMPLIFICATION | WT                | MUT:p.1M/V |
| <b>GBM-20013</b> | WT                        | WT            | AMPLIFICATION | DELETION | WT            | WT            | WT            | WT            | WT                | WT         |
| <b>GBM-20016</b> | WT                        | WT            | AMPLIFICATION | DELETION | WT            | WT            | WT            | WT            | WT                | WT         |
| <b>GBM-20017</b> | WT                        | WT            | AMPLIFICATION | DELETION | WT            | DELETION      | WT            | WT            | WT                | WT         |
| <b>GBM-10365</b> | WT                        | WT            | AMPLIFICATION | DELETION | WT            | DELETION      | WT            | WT            | WT                | WT         |
| <b>GBM-20028</b> | DELETION                  | DELETION      | WT            | DELETION | DELETION      | MUT:p.240-241 | DELETION      | DELETION      | WT                | WT         |
| <b>GBM-10449</b> | MUT:p.267R/W,MUT:p.124C/R | AMPLIFICATION | AMPLIFICATION | WT       | AMPLIFICATION | WT            | AMPLIFICATION | WT            | WT                | WT         |
| <b>GBM-20030</b> | WT                        | DELETION      | WT            | DELETION | DELETION      | MUT:p.22D/E   | DELETION      | DELETION      | WT                | WT         |
| <b>GBM-20031</b> | WT                        | DELETION      | AMPLIFICATION | DELETION | WT            | WT            | WT            | WT            | WT                | WT         |
| <b>GBM-20032</b> | WT                        | WT            | AMPLIFICATION | DELETION | WT            | DELETION      | WT            | WT            | MUT:p.448-449KL/K | WT         |
| <b>GBM-20034</b> | MUT:p.190P/L              | WT            | AMPLIFICATION | WT       | WT            | DELETION      | WT            | AMPLIFICATION | WT                | WT         |
| <b>GBM-10265</b> | WT                        | WT            | AMPLIFICATION | DELETION | WT            | DELETION      | WT            | AMPLIFICATION | DELETION          | DELETION   |
| <b>GBM-10132</b> | AMPLIFICATION             | DELETION      | AMPLIFICATION | WT       | WT            | DELETION      | WT            | AMPLIFICATION | WT                | DELETION   |
| <b>GBM-10355</b> | WT                        | WT            | AMPLIFICATION | DELETION | AMPLIFICATION | DELETION      | WT            | WT            | WT                | WT         |
| <b>GBM-10450</b> | WT                        | DELETION      | AMPLIFICATION | DELETION | DELETION      | DELETION      | DELETION      | DELETION      | DELETION          | DELETION   |
| <b>GBM-20041</b> | WT                        | WT            | AMPLIFICATION | WT       | WT            | WT            | WT            | WT            | WT                | WT         |

|                  |                  |               |               |          |                   |          |               |               |                                  |                  |
|------------------|------------------|---------------|---------------|----------|-------------------|----------|---------------|---------------|----------------------------------|------------------|
| <b>GBM-20043</b> | WT               | DELETION      | WT            | DELETION | WT                | WT       | DELETION      | AMPLIFICATION | WT                               | AMPLIFICATION    |
| <b>GBM-20044</b> | AMPLIFICATION    | AMPLIFICATION | AMPLIFICATION | DELETION | WT                | WT       | WT            | AMPLIFICATION | WT                               | WT               |
| <b>GBM-20045</b> | WT               | WT            | AMPLIFICATION | DELETION | WT                | DELETION | AMPLIFICATION | WT            | WT                               | WT               |
| <b>GBM-20048</b> | WT               | WT            | AMPLIFICATION | DELETION | WT                | WT       | DELETION      | WT            | MUT:p.457<br>Q/QEKSRE<br>YDRLYEE | WT               |
| <b>GBM-10448</b> | MUT:p.111L<br>/P | WT            | AMPLIFICATION | DELETION | WT                | DELETION | WT            | WT            | WT                               | WT               |
| <b>GBM-20050</b> | WT               | WT            | AMPLIFICATION | DELETION | WT                | DELETION | WT            | WT            | MUT:p.468E<br>/-                 | WT               |
| <b>GBM-20051</b> | MUT:p.151P<br>/S | WT            | AMPLIFICATION | WT       | WT                | WT       | WT            | WT            | WT                               | WT               |
| <b>GBM-20006</b> | MUT:p.           | WT            | WT            | WT       | WT                | WT       | WT            | WT            | WT                               | MUT:p.345<br>N/S |
| <b>GBM-30107</b> | WT               | WT            | WT            | DELETION | WT                | WT       | WT            | WT            | WT                               | WT               |
| <b>GBM-30109</b> | WT               | WT            | AMPLIFICATION | DELETION | WT                | DELETION | WT            | AMPLIFICATION | WT                               | WT               |
| <b>GBM-30111</b> | DELETION         | WT            | WT            | DELETION | WT                | DELETION | WT            | WT            | WT                               | WT               |
| <b>GBM-30118</b> | WT               | WT            | AMPLIFICATION | DELETION | WT                | DELETION | AMPLIFICATION | AMPLIFICATION | WT                               | WT               |
| <b>GBM-30142</b> | WT               | WT            | WT            | DELETION | MUT:p.1041<br>S/N | DELETION | WT            | WT            | MUT:p.567<br>K/E                 | WT               |
| <b>GBM-30143</b> | WT               | WT            | WT            | DELETION | WT                | DELETION | WT            | WT            | MUT:p.556-<br>559YREI/Y          | WT               |
| <b>GBM-30021</b> | WT               | WT            | AMPLIFICATION | DELETION | AMPLIFICATION     | DELETION | AMPLIFICATION | AMPLIFICATION | WT                               | WT               |
| <b>GBM-30239</b> | WT               | WT            | AMPLIFICATION | WT       | WT                | DELETION | AMPLIFICATION | AMPLIFICATION | WT                               | AMPLIFICATION    |
| <b>GBM-30026</b> | WT               | WT            | AMPLIFICATION | DELETION | AMPLIFICATION     | DELETION | AMPLIFICATION | WT            | WT                               | AMPLIFICATION    |
| <b>GBM-30028</b> | AMPLIFICATION    | AMPLIFICATION | AMPLIFICATION | DELETION | WT                | DELETION | WT            | WT            | WT                               | WT               |

|                  |               |               |               |          |    |          |               |               |                   |    |
|------------------|---------------|---------------|---------------|----------|----|----------|---------------|---------------|-------------------|----|
| <b>GBM-30029</b> | WT            | DELETION      | WT            | DELETION | WT | DELETION | WT            | WT            | WT                | WT |
| <b>GBM-30031</b> | WT            | WT            | AMPLIFICATION | WT       | WT | WT       | AMPLIFICATION | AMPLIFICATION | MUT:p.404-405LI/L | WT |
| <b>GBM-30056</b> | MUT:p.248R/Q  | AMPLIFICATION | AMPLIFICATION | DELETION | WT | DELETION | WT            | AMPLIFICATION | AMPLIFICATION     | WT |
| <b>GBM-30059</b> | WT            | WT            | AMPLIFICATION | DELETION | WT | DELETION | WT            | WT            | WT                | WT |
| <b>GBM-30092</b> | AMPLIFICATION | WT            | WT            | WT       | WT | DELETION | WT            | WT            | WT                | WT |
| <b>GBM-30099</b> | MUT:p.216V/M  | MUT:p.2539    | WT            | WT       | WT | WT       | WT            | WT            | WT                | WT |
| <b>GBM-10400</b> | WT            | WT            | AMPLIFICATION | WT       | WT | DELETION | AMPLIFICATION | AMPLIFICATION | WT                | WT |
